# Supplementary material
Source: PubMed Central journal article supplement (PMC153004)
Supplement: pnas_0636904100_1.pdf [file pnas_0636904100_1.pdf]

**Table 2.** Acquisition parameters for NMR experiments performed on Cu(I)-CopC

| Experiments                                                    | Dimension of acquired data (nucleus) |                       |                       | Spectral width, ppm |                |                | N*   | Ref  |
|----------------------------------------------------------------|--------------------------------------|-----------------------|-----------------------|---------------------|----------------|----------------|------|------|
|                                                                | t <sub>1</sub>                       | t <sub>2</sub>        | t <sub>3</sub>        | F <sub>1</sub>      | F <sub>2</sub> | F <sub>3</sub> |      |      |
| [ <sup>1</sup> H- <sup>1</sup> H]-NOESY                        | 1024( <sup>1</sup> H)                | 2048( <sup>1</sup> H) |                       | 14                  | 14             |                | 64   | 1    |
| [ <sup>1</sup> H- <sup>1</sup> H]-TOCSY                        | 1024( <sup>1</sup> H)                | 2048( <sup>1</sup> H) |                       | 14                  | 14             |                | 32   | 2    |
| <sup>1</sup> H- <sup>15</sup> N-HSQC                           | 256( <sup>15</sup> N)                | 2048( <sup>1</sup> H) |                       | 40                  | 7              |                | 16   | 3    |
| <sup>1</sup> H- <sup>13</sup> C-HSQC                           | 256( <sup>13</sup> C)                | 2048( <sup>1</sup> H) |                       | 70                  | 14             |                | 16   | 4    |
| HNCO                                                           | 128( <sup>13</sup> C)                | 64( <sup>15</sup> N)  | 1024( <sup>1</sup> H) | 20                  | 41             | 14             | 8    | 4    |
| Long-range HNCO                                                | 128( <sup>13</sup> C)                | 1024( <sup>1</sup> H) |                       | 20                  | 14             |                | 1024 | 5    |
| CBCA(CO)NH                                                     | 128( <sup>13</sup> C)                | 64( <sup>15</sup> N)  | 1024( <sup>1</sup> H) | 70                  | 40             | 14             | 16   | 6    |
| CBCANH                                                         | 128( <sup>13</sup> C)                | 64( <sup>15</sup> N)  | 1024( <sup>1</sup> H) | 70                  | 40             | 14             | 16   | 7    |
| <sup>13</sup> C (H)CCH-TOCSY                                   | 256( <sup>1</sup> H)                 | 128( <sup>13</sup> C) | 1024( <sup>1</sup> H) | 14                  | 70             | 14             | 8    | 8    |
| <sup>15</sup> N-edited [ <sup>1</sup> H- <sup>1</sup> H]-NOESY | 256( <sup>1</sup> H)                 | 64( <sup>15</sup> N)  | 1024( <sup>1</sup> H) | 14                  | 41             | 7              | 16   | 9–11 |
| <sup>13</sup> C-edited [ <sup>1</sup> H- <sup>1</sup> H]-NOESY | 256( <sup>1</sup> H)                 | 128( <sup>13</sup> C) | 1024( <sup>1</sup> H) | 14                  | 71             | 14             | 16   | 9–11 |
| HNHA                                                           | 144( <sup>1</sup> H)                 | 128( <sup>15</sup> N) | 1024( <sup>1</sup> H) | 14                  | 41             | 7              | 32   | 12   |
| HNHB                                                           | 144( <sup>1</sup> H)                 | 128( <sup>15</sup> N) | 1024( <sup>1</sup> H) | 14                  | 41             | 7              | 32   | 13   |

For triple resonance experiments, quadrature detection in the indirect dimensions was performed in the Echo/Antiecho-TPPI mode (14). For 2D experiments, quadrature detection in the indirect dimension was performed in the TPPI mode (14), and water suppression was achieved through WATERGATE sequence (15).

\*, Number of acquired scans.

1. Macura, S. & Ernst, R. R. (1980) *Mol. Phys.* **41**, 95–95.
2. Bax, A. & Davis, D. G. (1985) *J. Magn. Reson.* **65**, 355–360.
3. Bodenhausen, G. & Ruben, D. J. (1980) *Chem. Phys. Lett.* **69**, 185–188.
4. Grzesiek, S. & Bax, A. (1992) *J. Magn. Reson.* **96**, 432–440.

5. Banci, L., Felli, I. C. & Kummerle, R. (2002) *Biochemistry* **41**, 2913–2920.
6. Muhandiram, D. R. & Kay, L. E. (1994) *J. Magn. Reson. Ser. B* **103**, 203–216.
7. Grzesiek, S. & Bax, A. (1992) *J. Magn. Reson.* **99**, 201–207.
8. Kay, L. E., Xu, G. Y., Singer, A. U., Muhandiram, D. R. & Forman-Kay, J. D. (1993) *J. Magn. Reson. Ser. B* **101**, 333–337.
9. Wider, G., Neri, D., Otting, G. & Wüthrich, K. (1989) *J. Magn. Reson.* **85**, 426–431.
10. Kay, L.E., Keifer, P. & Saarinen, T. (1992) *J. Am. Chem. Soc.* **114**, 10663–10665.
11. Schleucher, J., Schwendinger, M., Sattler, M., Schmidt, P., Schedletsky, O., Glaser, S. J., Sorensen, O. W. & Griesinger, C. (1994) *J. Biomol. NMR* **4**, 301–306.
12. Vuister, G. W. & Bax, A. (1993) *J. Am. Chem. Soc.* **115**, 7772–7777.
13. Archer, S. J., Ikura, M., Torchia, D. A. & Bax, A. (1991) *J. Magn. Reson.* **95**, 636–641.
14. Marion, D. & Wüthrich, K. (1983) *Biochem. Biophys. Res. Commun.* **113**, 967–974.
15. Piotto, M., Saudek, V. & Sklenar, V. (1992) *J. Biomol. NMR* **2**, 661–666.
