# Supplementary material
Source: PubMed Central journal article supplement (PMC153004)

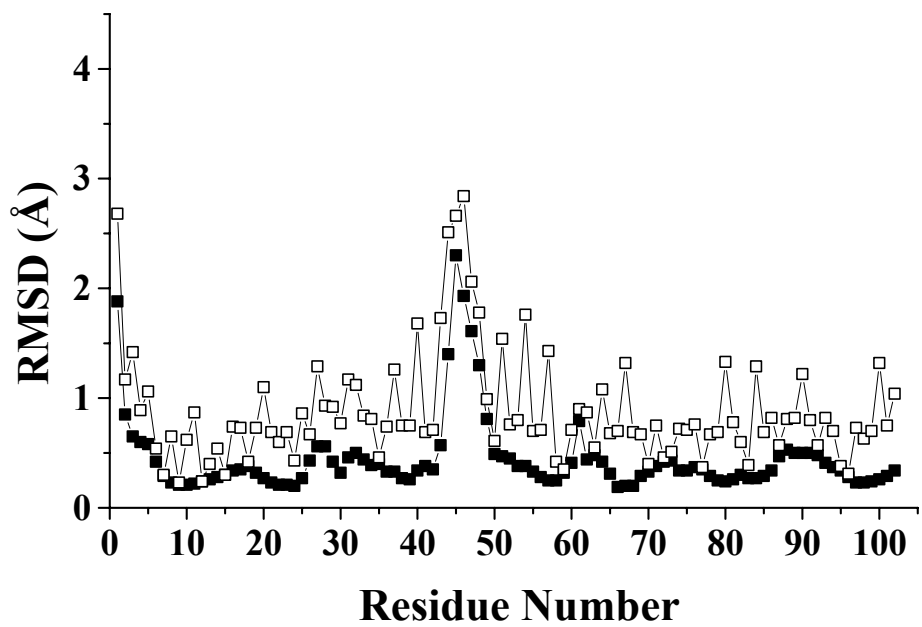

Supplement: pnas_0636904100_4.pdf [file pnas_0636904100_4.pdf]

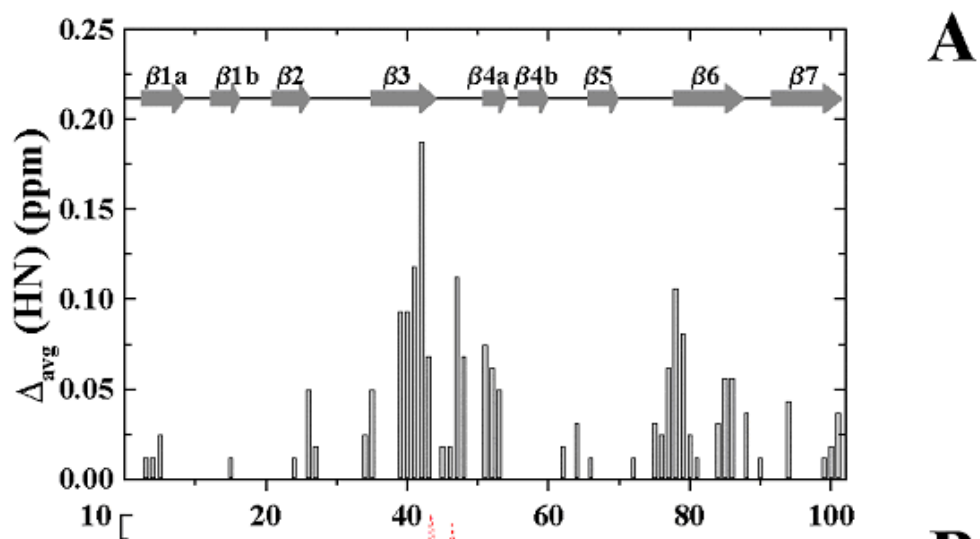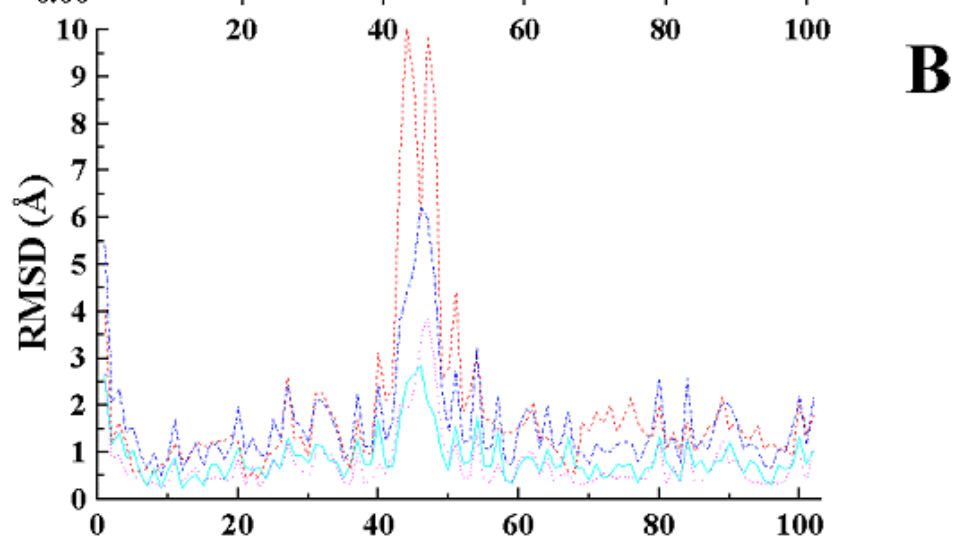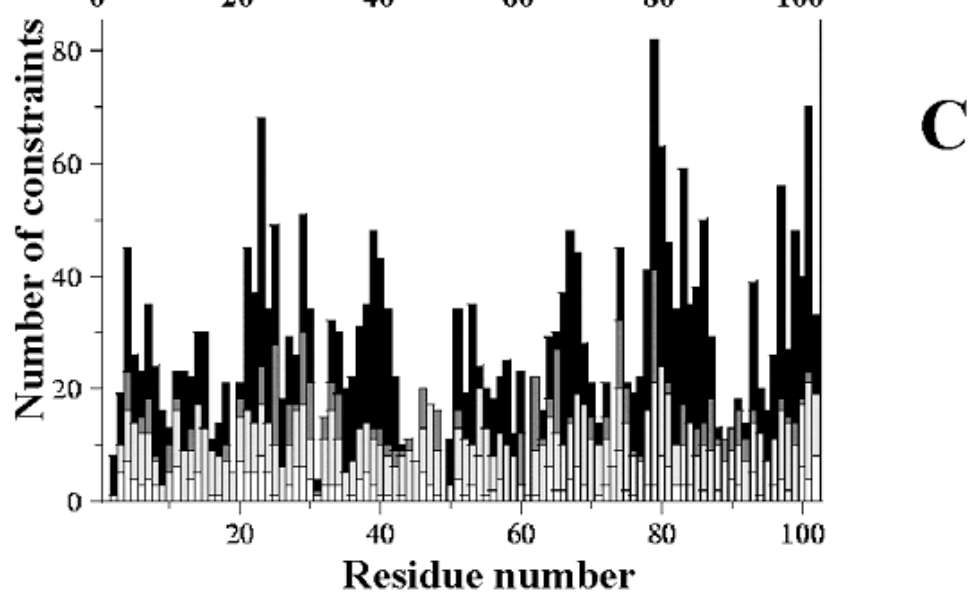

Supplement: pnas_0636904100_6.pdf [file pnas_0636904100_6.pdf]
